# Supplementary material for: Brain-wide projection reconstruction of single functionally defined neurons
Source: PubMed Central journal article supplement (PMC8940919; doi:10.1038/s41467-022-29229-0), 2022-03-22
Supplement: 41467_2022_29229_MOESM1_ESM.pdf [file 41467_2022_29229_MOESM1_ESM.pdf]

**Supplementary Information**

**Brain-wide projection reconstruction of single functionally  
defined neurons**

**Wang et al.**

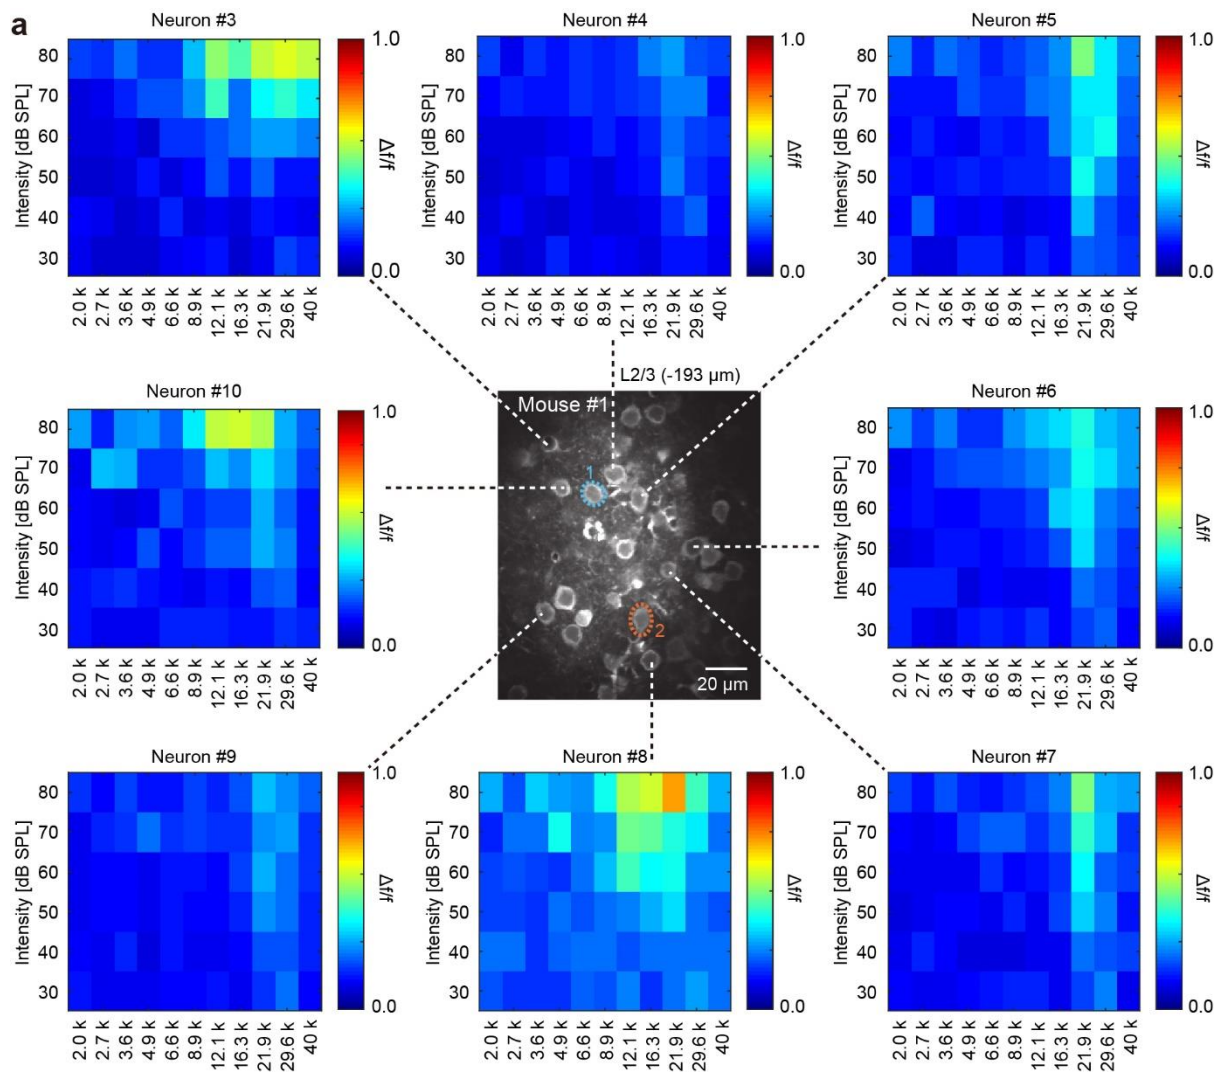

**Supplementary Fig. 1** FRAs of individual neurons in L2/3 of the AUD recorded by two-photon  $\text{Ca}^{2+}$  imaging. Centre panel: Representative two-photon image in L2/3 of the AUD (depth is 193  $\mu\text{m}$  from the pial surface). Surrounding panels: Colour-coded FRAs of individual neurons in the imaging plane. The dashed lines indicate the soma location of each neuron.

Numbers of labelled neurons

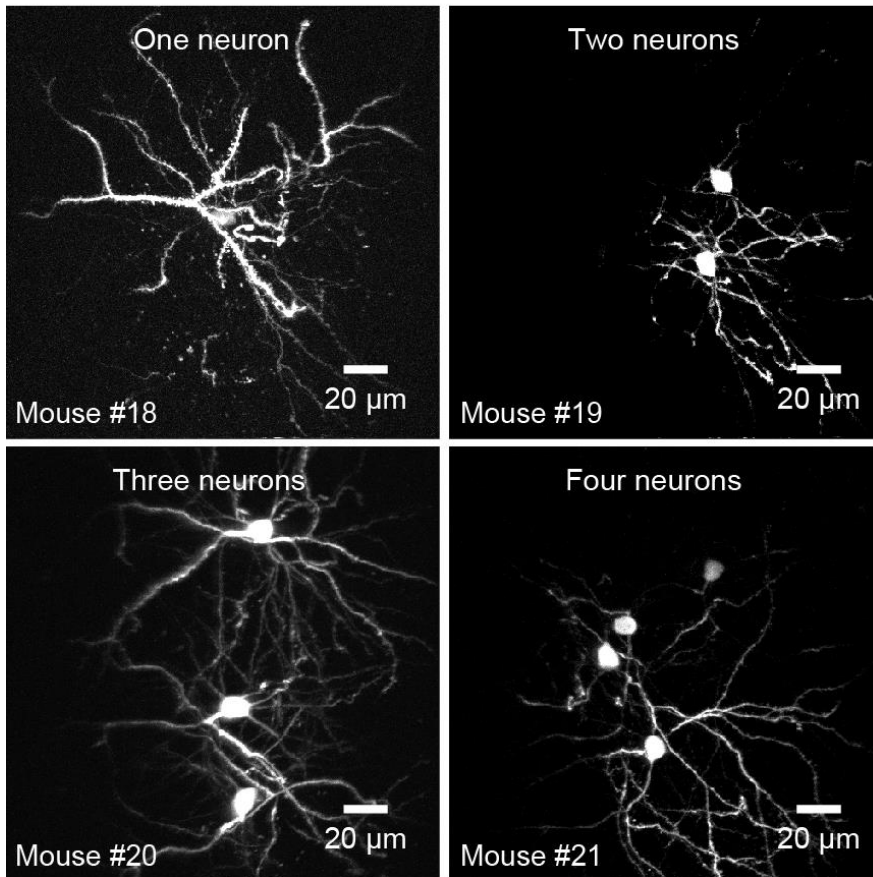

**Supplementary Fig. 2 Controlled labelling of 1-4 neurons within a field of view by electroporation.**

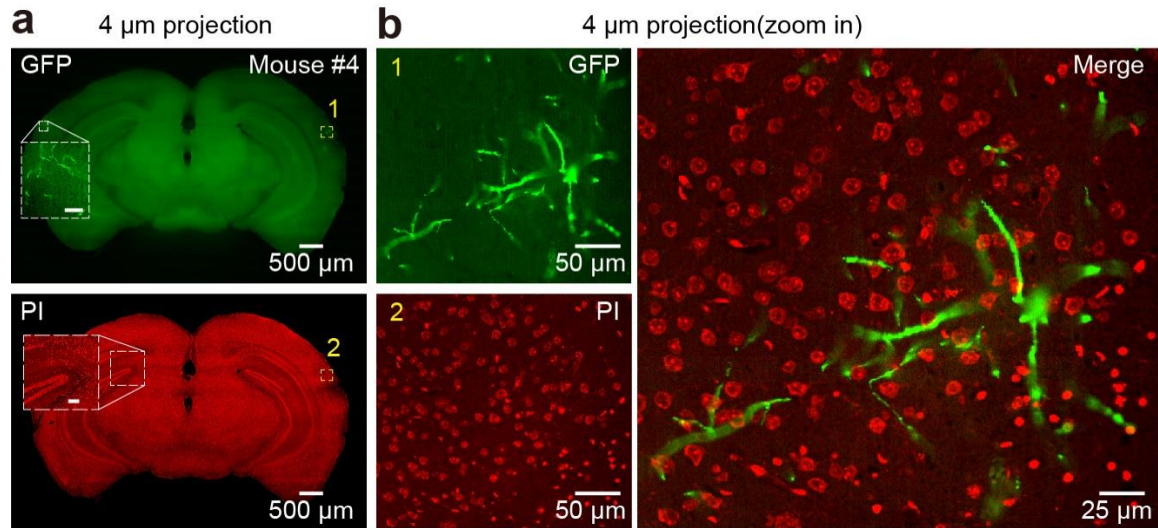

**Supplementary Fig. 3 Whole-brain dual-colour imaging.** **a** Maximum intensity projections of two serial coronal sections in the GFP channel (upper) and PI channel (lower). **b** Enlarged views of the areas outlined by the yellow dashed boxes in **a**. Left: two channels shown separately; right: merged image.

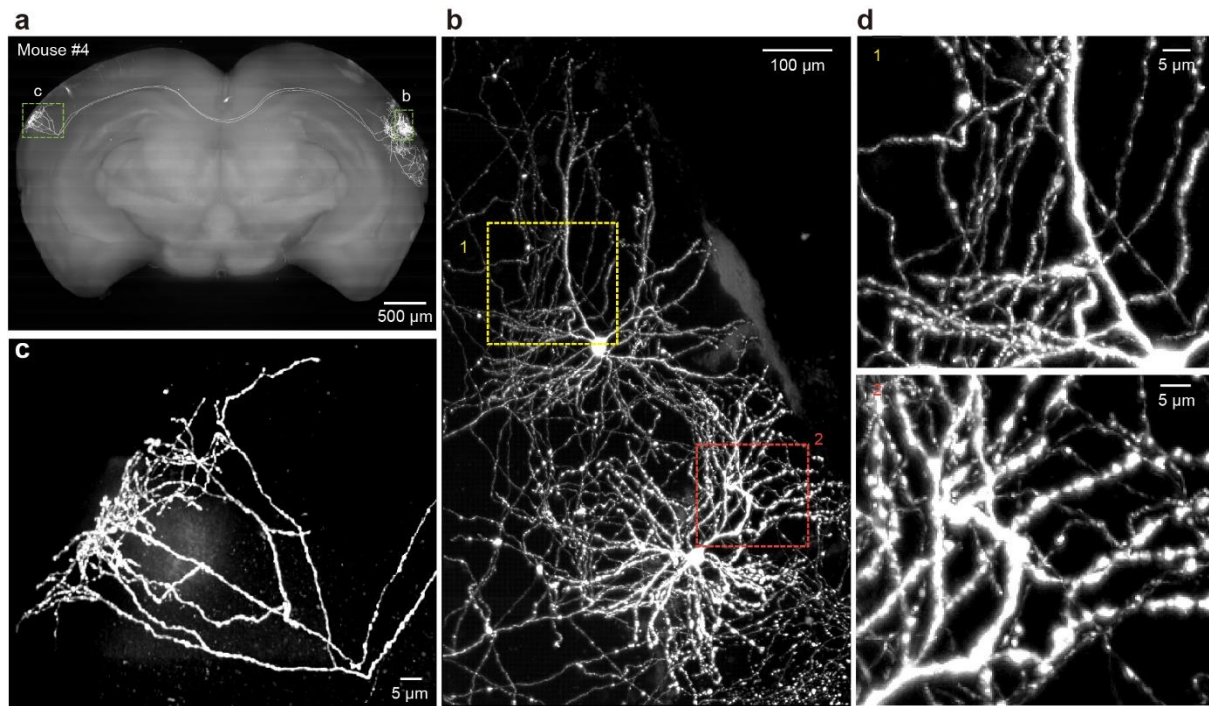

**Supplementary Fig. 4 Representative images of whole-brain raw signals of labelled neurons in the AUD.** **a** Coronal view of whole-brain maximum intensity projections. **b-c** Enlargement of the corresponding boxes in **a** showing labelled neurons in the injection site (**b**) and contralateral axonal arborizations (**c**). **d** Enlargement of the respective boxes in **b** showing the fine structures of dendrites.

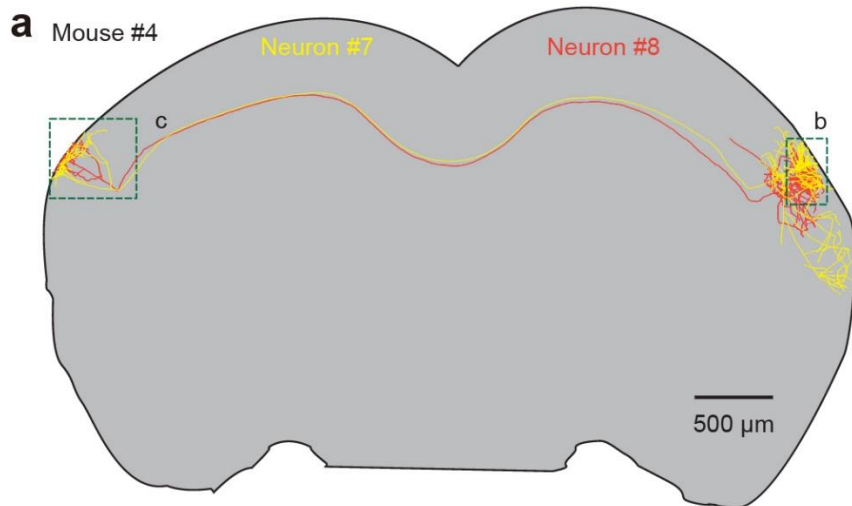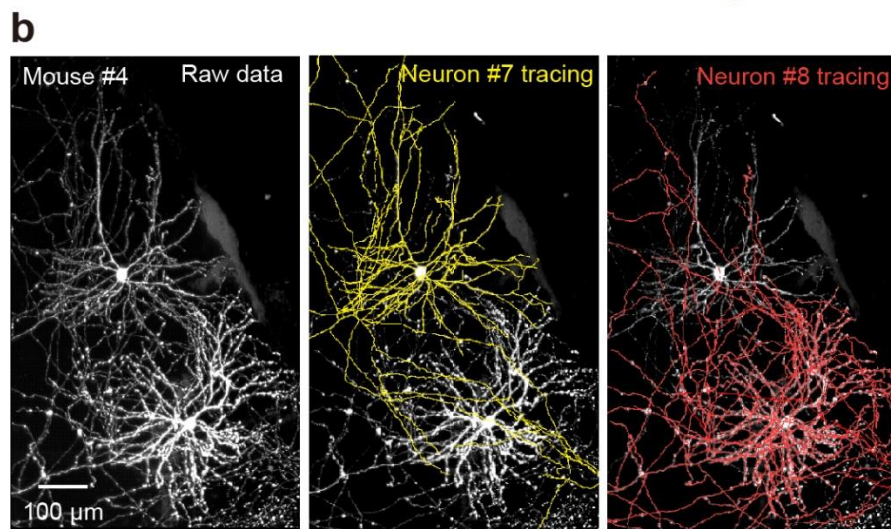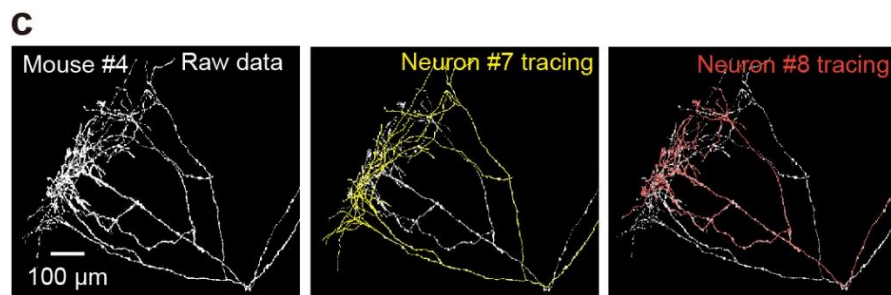

**Supplementary Fig. 5 Complete manual reconstruction of individual neurons.** **a** Reconstruction of two representative neurons with long-range projections. Each colour indicates one neuron. **b** Left: image stack of neurites and somata of two reconstructed neurons. Middle to right: reconstructed dendrites of neurons #7 and #8, respectively. **c** Left: image stack of axonal arborizations of the two reconstructed neurons. Middle to right: reconstructed terminal structures of neurons #7 and #8, respectively.

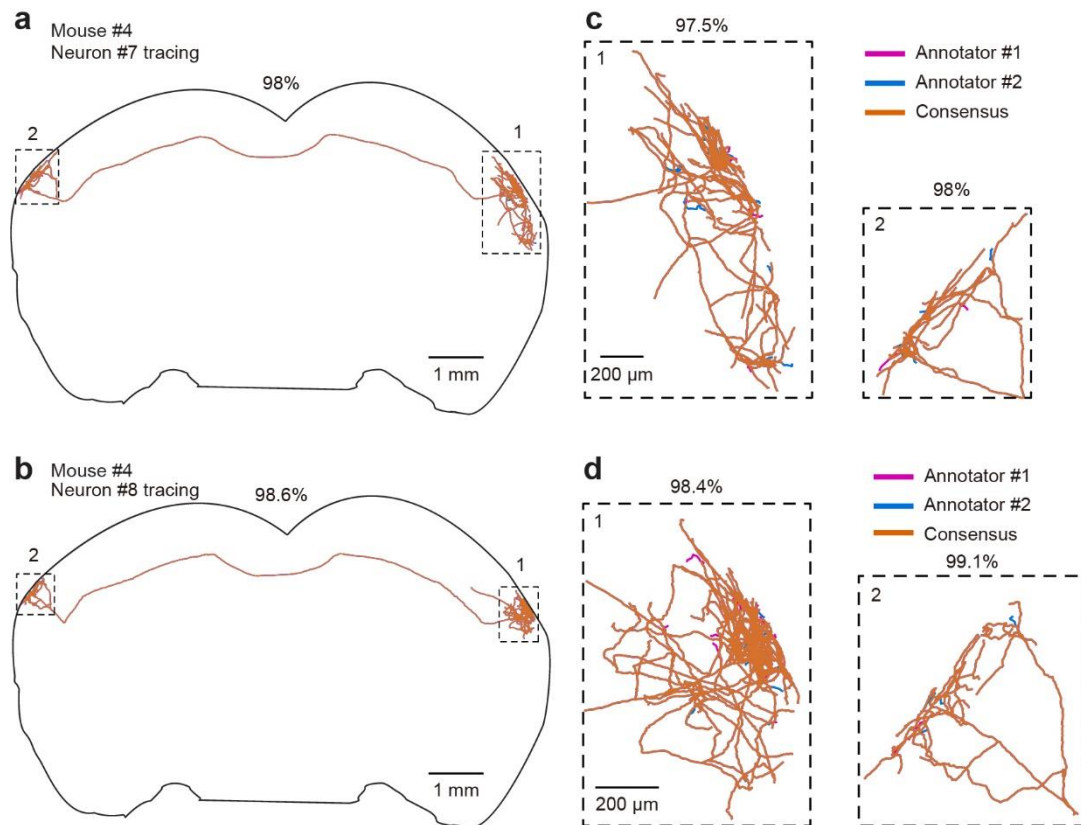

**Supplementary Fig. 6 Validation of the accuracy of manual tracing.** **a-b** Overview of two long-range projecting neurons (neurons #7 and #8) reconstructed by two experienced annotators. **c-d** Enlargement of the respective boxes in **a** and **b** showing the details of tracing by annotator #1 (pink) and annotator #2 (cyan) and the consensus between the two annotators (orange).

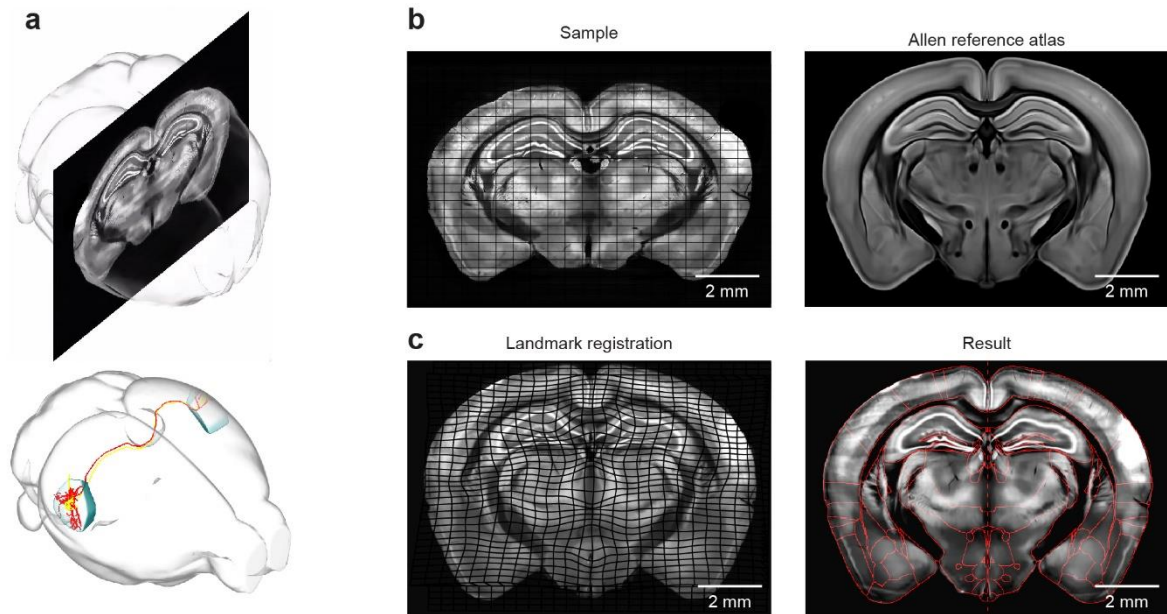

**Supplementary Fig. 7 Representative images of reconstructed neurons registered to the standard Allen Brain Atlas.** **a** Raw brain image with overlaid neurites aligned to the template of the Allen Brain Atlas. **b-c** A representative coronal section selected from **a** (**b**; left) was registered to the template of the Allen Brain Atlas (**b**; right) after dense landmark-based 2D registration (**c**; left) with the local-regions approach (**c**; right).



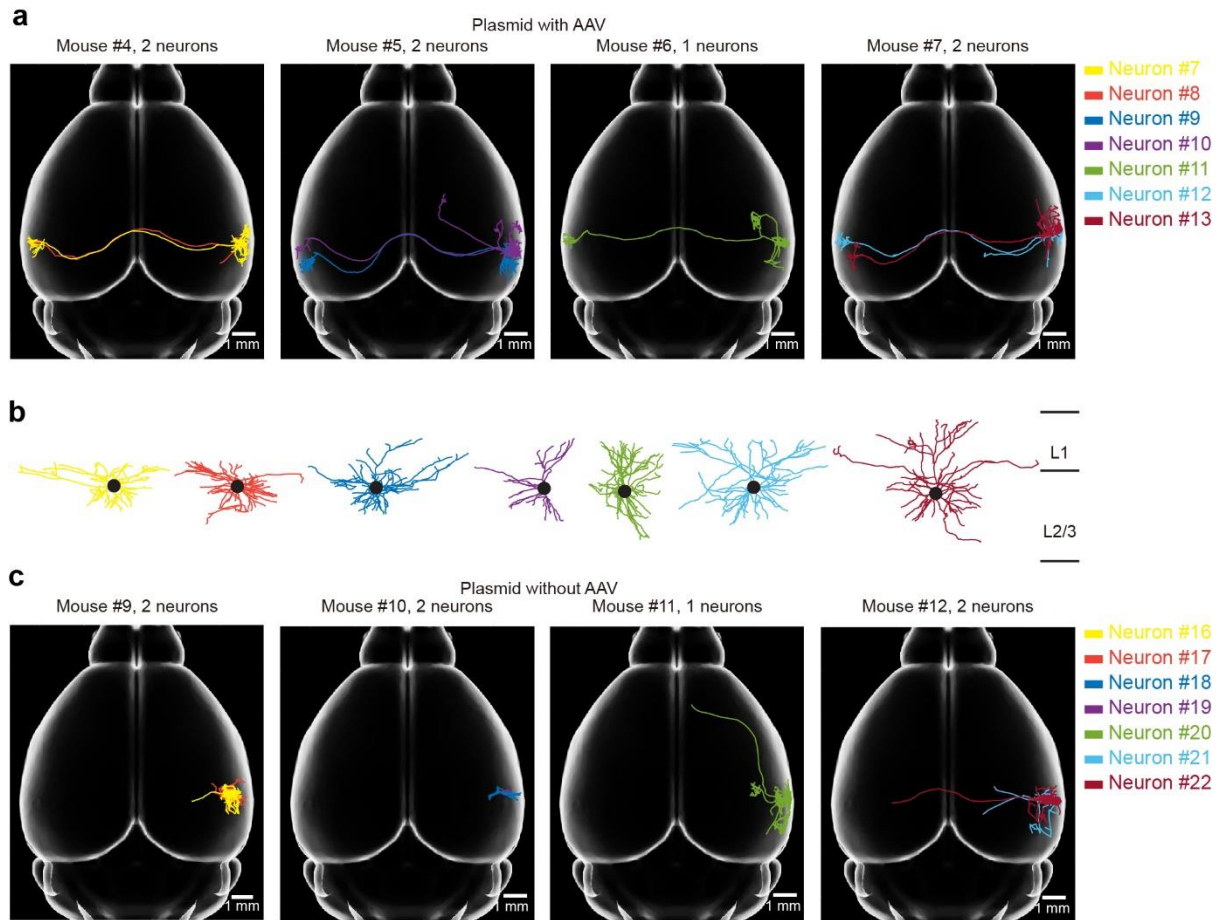

**Supplementary Fig. 8 Comparison of the reconstructed neurons labelled with different methods.** **a** Horizontal view of the reconstructed individual neurons labelled by plasmid with local AAV injection. The results for four mice are shown separately. **b** Enlarged view of the dendrites of the reconstructed neurons shown in **a**. **c** Horizontal view of the reconstructed individual neurons labelled by plasmid without AAV injection. The results for four mice are shown separately.

## Supplementary Table 1 Troubleshooting guide.

| Step                                                                                 | Critical milestone                                                                                                                                          | Problem                                                                                                | Possible reason                                                                                                                  | Solution                                                                                                                                                                                                                                                |
|--------------------------------------------------------------------------------------|-------------------------------------------------------------------------------------------------------------------------------------------------------------|--------------------------------------------------------------------------------------------------------|----------------------------------------------------------------------------------------------------------------------------------|---------------------------------------------------------------------------------------------------------------------------------------------------------------------------------------------------------------------------------------------------------|
| Step 1:<br>Functional identification of neurons by 2P Ca <sup>2+</sup> imaging [1-5] | 1, Perform surgery for 2P imaging (be very careful not to damage the cortex and keep the dura as intact as possible) *                                      | Brain damage                                                                                           | Inaccurate thinning or improper pressing onto the skull                                                                          | Thinning as gently as possible and do not press the skull                                                                                                                                                                                               |
|                                                                                      | 2, Perform bolus loading of a Ca <sup>2+</sup> dye (the standard Ca <sup>2+</sup> -free Ringer's solution is used to minimize precipitation of the dye) *   | Cells are not stained                                                                                  | The staining electrode gets clogged or the tissue is damaged                                                                     | Monitor the pipette resistance during dye injection                                                                                                                                                                                                     |
|                                                                                      | 3, Wait for an hour to obtain a stable maximal fluorescence level for stained neurons                                                                       | The stained dim cells emit too little fluorescence to be detected in vivo                              | The waiting time is either too long or too short                                                                                 | A stable level of fluorescence within stained cells was reached 1 h after dye injection, from which recording was started and continuous experiments were achievable with duration of 4-6 h                                                             |
|                                                                                      | 4, Perform Ca <sup>2+</sup> imaging and sound stimulation (monitor photobleaching and adjust excitation power to levels just below the bleaching threshold) | Ca <sup>2+</sup> signals are absent in neuronal somata over multiple trials                            | Dye bleaching or photodamage occurs due to high laser power during recording                                                     | Reduce the laser power as much as possible                                                                                                                                                                                                              |
| Step 2:<br>Targeted labelling of functionally identified neurons [6, 7]              | 1, Electroporate a plasmid to a targeted neuron (no clogging is critical) ***                                                                               | Low success rates                                                                                      | 1, pipette clogged; 2, inaccurate distance between the pipette and the neuron; 3, sub-optimal electroporation parameters         | 1, change a new pipette; 2, target the center of the cell soma before electroporation; 3, optimize the amplitude and/or number of voltage pulses during electroporation                                                                                 |
|                                                                                      | 2, Inject AAV locally (distance from the injection site to the electroporated neuron is critical) ***                                                       | Weak and uneven fluorescence signal intensity in our electroporated neurons                            | No enough virus particles taken up                                                                                               | The distance between the virus injection site and the electroporated neuron is within the range of 50 µm and 300 µm                                                                                                                                     |
|                                                                                      | 3, Cranial window implantation (chronic imaging in awake mice over several weeks is critical) ****                                                          | Chronic imaging is no longer possible in the weeks following surgery                                   | 1, coverglass is dirty; 2, insufficient application of vetbond and/or dental acrylic; 3, inflammatory reaction or skull regrowth | 1, clean coverglass with 70% ethanol before application; 2, Make sure all the edges and exposed skull are covered with dental acrylic; 3, treat the mouse with carprofen, sulfamethoxazole + trimethoprim for 7–10 d and try imaging again after 7–10 d |
| Step 3:<br>Brain-wide dual-colour imaging [8]                                        | 1, Whole mouse brain preparation (fixation in PFA and rinse in PBS are critical)                                                                            | 1, brain with strong spontaneous fluorescence; 2, morphological changes in neurons in the brain tissue | 1, too much blood residue in the brain; 2, mouse is too young or perfusion rate is too high                                      | 1, prolong the time of PBS perfusion; 2, use an adult mouse or reduce the rate of perfusion                                                                                                                                                             |
|                                                                                      | 2, Embedding (sample polymerization are critical) *                                                                                                         | Morphological changes in neurons in the brain tissue                                                   | Initial polymerization temperature is too high                                                                                   | Set initial polymerization temperature to 50°C                                                                                                                                                                                                          |
|                                                                                      | 3, Perform fMOST imaging (continuous whole-brain imaging of green and red channels simultaneously is critical)                                              | Incomplete or too large whole-brain data                                                               | Improper imaging parameters are set                                                                                              | Set the imaging parameters, e.g., range of interest and exposure time, properly                                                                                                                                                                         |
| Step 4:<br>Single-cell reconstruction and analysis [9, 10]                           | 1, Reconstruct complete morphology of individual neurons by manual (two annotators reaching consensus for reconstructions is critical) *                    | Inaccurate and incomplete reconstructions of individual neurons                                        | Poor signal-to-noise ratio or from occasional attentional drift of individual annotators                                         | Reconstruct neurons with consistent fluorescent signal throughout the entire axonal arbor and every neuron is reconstructed by two annotators                                                                                                           |
|                                                                                      | 2, Perform image registration and quantitative analysis at whole-brain level (accurate registration for whole-brain datasets is critical) *                 | Inaccurate transformation of brain structures in three dimensions                                      | No sufficient feature points are extracted accurately to ensure the registration quality                                         | All the reconstructed neurons are registered to the template of the Allen Brain Atlas by combining the approaches of greyscale-based 3D registration and dense-landmark-based 2D registration in the local regions                                      |

### References

- [1] Chen, X. et al. Functional mapping of single spines in cortical neurons in vivo. *Nature* 475, 501-505 (2011).
- [2] Rothschild, G., I. Nelken, and A. Mizrahi. Functional organization and population dynamics in the mouse primary auditory cortex. *Nature Neuroscience* 13, 353-360 (2010).
- [3] Tischbirek, C. H. et al. In Vivo Functional Mapping of a Cortical Column at Single-Neuron Resolution. *Cell Reports* 27, 1319-1326 (2019).
- [4] Stosiek, C. et al. In vivo two-photon calcium imaging of neuronal networks. *Proceedings of the National Academy of Sciences of the United States of America* 100, 7319-7319 (2003).
- [5] Olga, et al. Targeted bulk-loading of fluorescent indicators for two-photon brain imaging in vivo. *Nature protocols* 1, 380-386 (2006).
- [6] Kitamura, K. et al. Targeted patch-clamp recordings and single-cell electroporation of unlabeled neurons in vivo. *Nature Methods* 5, 61-67(2008).
- [7] Judkewitz, B. et al. Targeted single-cell electroporation of mammalian neurons in vivo. *Nature Protocols* 4, 862-869 (2009).
- [8] Gong, H. et al. High-throughput dual-colour precision imaging for brain-wide connectome with cytoarchitectonic landmarks at the cellular level. *Nature Communications* 7, 12142 (2016).
- [9] Winnubst, J. et al. Reconstruction of 1,000 Projection Neurons Reveals New Cell Types and Organization of Long-Range Connectivity in the Mouse Brain. *Cell* 179, 268-281 (2019).
- [10] Ni, H. et al. A Robust Image Registration Interface for Large Volume Brain Atlas. *Scientific Reports* 10, 2139 (2020).
- \* The asterisk indicates the step is critical. The number of asterisks indicates the critical degree of the step.

**Supplementary Table 2 Numbers of labelled cells after electroporation and labelling success rate in consecutive experiments.**

| Labelling success rate |                          |                      |                             |                              |                              |
|------------------------|--------------------------|----------------------|-----------------------------|------------------------------|------------------------------|
| Mouse number           | 1h after electroporation | spontaneous activity | 5 day after electroporation | 10 day after electroporation | 30 day after electroporation |
| Mouse #1               | 2                        | 2                    | 2                           | 2                            | 2                            |
| Mouse #2               | 3                        | 3                    | 2                           | 2                            | 2                            |
| Mouse #3               | 2                        | 2                    | 2                           | 2                            | 2                            |
| Mouse #4               | 2                        | 2                    | 2                           | 2                            | 2                            |
| Mouse #5               | 4                        | 2                    | 2                           | 2                            | 2                            |
| Mouse #6               | 2                        | 2                    | 1                           | 1                            | 1                            |
| Mouse #7               | 2                        | 2                    | 2                           | 2                            | 2                            |
| Mouse #8               | 2                        | 2                    | 2                           | 2                            | 2                            |
| Mouse #9               | 2                        | 2                    | 2                           | 2                            | 2                            |
| Mouse #10              | 2                        | 2                    | 2                           | 2                            | 2                            |
| Mouse #11              | 2                        | 2                    | 1                           | 1                            | 1                            |
| Mouse #12              | 4                        | 3                    | 2                           | 2                            | 2                            |
| Mouse #18              | 1                        | 1                    | 1                           | 1                            | 1                            |
| Mouse #19              | 2                        | 2                    | 2                           | 2                            | 2                            |
| Mouse #20              | 3                        | 3                    | 3                           | 3                            | 3                            |
| Mouse #21              | 4                        | 4                    | 4                           | 4                            | 4                            |
| Total neuron numbers   | 39                       | 36                   | 32                          | 32                           | 32                           |
| Success rate           |                          | 92%                  | 82%                         | 82%                          | 82%                          |

**Supplementary Table 3 Morphological parameters of the reconstructed neurons labelled with different methods.**

| Our method (Plasmid+virus) in auditory cortex           |               |               |                          |                 |               |                          |               |
|---------------------------------------------------------|---------------|---------------|--------------------------|-----------------|---------------|--------------------------|---------------|
| Mouse number                                            | Neuron number | Soma location | Dendrite                 |                 |               | Axon                     |               |
|                                                         |               |               | Length ( $\mu\text{m}$ ) | Dendrite number | Branch number | Length ( $\mu\text{m}$ ) | Branch number |
| Mouse #1                                                | Neuron #1     | AUDp2/3       | 5,896                    | 9               | 121           | 74,056                   | 543           |
|                                                         | Neuron #2     | AUDp2/3       | 2,321                    | 6               | 50            | 25,045                   | 161           |
| Mouse #2                                                | Neuron #3     | AUDp2/3       | 4,830                    | 7               | 125           | 41,656                   | 241           |
|                                                         | Neuron #4     | AUDp2/3       | 4,135                    | 7               | 95            | 28,969                   | 163           |
| Mouse #3                                                | Neuron #5     | AUDp2/3       | 5,075                    | 10              | 128           | 61,375                   | 620           |
|                                                         | Neuron #6     | AUDp2/3       | 4,498                    | 7               | 123           | 52,658                   | 549           |
| Mouse #4                                                | Neuron #7     | AUDp2/3       | 3,212                    | 7               | 111           | 46,409                   | 265           |
|                                                         | Neuron #8     | AUDp2/3       | 4,238                    | 10              | 126           | 40,331                   | 280           |
| Mouse #5                                                | Neuron #9     | AUDp2/3       | 4,137                    | 8               | 128           | 43,030                   | 329           |
|                                                         | Neuron #10    | AUDp2/3       | 2,029                    | 6               | 58            | 60,538                   | 517           |
| Mouse #6                                                | Neuron #11    | AUDp2/3       | 5,766                    | 7               | 135           | 45,071                   | 322           |
|                                                         | Neuron #12    | AUDp2/3       | 6,674                    | 6               | 127           | 40,003                   | 163           |
| Mouse #7                                                | Neuron #13    | AUDp2/3       | 6,184                    | 7               | 106           | 43,149                   | 199           |
| Only plasmid in auditory cortex                         |               |               |                          |                 |               |                          |               |
| Mouse #8                                                | Neuron #14    | AUDp2/3       | 4,044                    | 8               | 88            | 27,851                   | 153           |
|                                                         | Neuron #15    | AUDp2/3       | 3,702                    | 9               | 102           | 45,345                   | 237           |
| Mouse #9                                                | Neuron #16    | AUDp2/3       | 4,235                    | 8               | 104           | 34,650                   | 277           |
|                                                         | Neuron #17    | AUDp2/3       | 4,193                    | 8               | 110           | 35,786                   | 251           |
| Mouse #10                                               | Neuron #18    | AUDp2/3       | 2,362                    | 8               | 89            | 14,264                   | 91            |
|                                                         | Neuron #19    | AUDp2/3       | 3,358                    | 8               | 118           | 521                      | 11            |
| Mouse #11                                               | Neuron #20    | AUDp2/3       | 5,176                    | 7               | 137           | 44,492                   | 336           |
| Mouse #12                                               | Neuron #21    | AUDp2/3       | 5,190                    | 8               | 106           | 41,931                   | 203           |
|                                                         | Neuron #22    | AUDp2/3       | 5,680                    | 10              | 111           | 46,295                   | 237           |
| Sparse labelling system (only virus) in auditory cortex |               |               |                          |                 |               |                          |               |
| Mouse number                                            | Neuron number | Soma location | Dendrite                 |                 |               | Axon                     |               |
|                                                         |               |               | Length ( $\mu\text{m}$ ) | Dendrite number | Branch number | Length ( $\mu\text{m}$ ) | Branch number |
| Mouse #13                                               | Neuron #23    | AUDp2/3       | 6,581                    | 8               | 162           | 41,416                   | 269           |
| Mouse #14                                               | Neuron #24    | AUDp2/3       | 4,608                    | 9               | 96            | 54,782                   | 327           |
| Mouse #15                                               | Neuron #25    | AUDp2/3       | 4,530                    | 7               | 119           | 49,379                   | 343           |
|                                                         | Neuron #26    | AUDp2/3       | 4,242                    | 8               | 104           | 30,238                   | 167           |
|                                                         | Neuron #27    | AUDp2/3       | 4,861                    | 6               | 97            | 35,163                   | 179           |
|                                                         | Neuron #28    | AUDp2/3       | 3,047                    | 5               | 61            | 29,883                   | 129           |
| Our method (Plasmid+virus) in motor cortex              |               |               |                          |                 |               |                          |               |
| Mouse number                                            | Neuron number | Soma location | Dendrite                 |                 |               | Axon                     |               |
|                                                         |               |               | Length ( $\mu\text{m}$ ) | Dendrite number | Branch number | Length ( $\mu\text{m}$ ) | Branch number |
| Mouse #16                                               | Neuron #29    | MO2/3         | 6,603                    | 7               | 129           | 47,559                   | 460           |
|                                                         | Neuron #30    | MO2/3         | 5,825                    | 9               | 88            | 55,917                   | 301           |
|                                                         | Neuron #31    | MO2/3         | 4,113                    | 4               | 58            | 27,629                   | 147           |
|                                                         | Neuron #32    | MO2/3         | 6,334                    | 9               | 98            | 48,251                   | 197           |
| Mouse #17                                               | Neuron #33    | MO5           | 6,189                    | 7               | 95            | 96,726                   | 517           |
|                                                         | Neuron #34    | MO5           | 9,481                    | 11              | 118           | 211,821                  | 773           |
|                                                         | Neuron #35    | MO5           | 7,939                    | 12              | 98            | 109,834                  | 499           |
|                                                         | Neuron #36    | MO5           | 7,432                    | 17              | 93            | 77,114                   | 363           |

**Supplementary Table 4 Target areas of the reconstructed neurons in the auditory cortex.**

| The target areas of neurons in the auditory cortex |        |           |       |       |      |       |       |       |       |       |       |       |       |        |      |      |       |      |              |            |       |
|----------------------------------------------------|--------|-----------|-------|-------|------|-------|-------|-------|-------|-------|-------|-------|-------|--------|------|------|-------|------|--------------|------------|-------|
| Mouse                                              | Neuron | Isocortex |       |       |      |       |       |       |       |       |       |       |       |        |      |      |       | STR  | fiber tracts | axon total |       |
|                                                    |        | AI_i      | AUD_i | AUD_c | MO_l | ssp_i | SSP_c | SSs_i | SSs_c | TEa_i | TEa_c | VIS_i | VIS_c | VISC_i | LA_i | GU_i | ECT_i | CP_i |              |            |       |
| #1                                                 | #1     |           | 41232 | 13361 |      |       |       | 360   |       | 856   | 349   |       |       |        |      |      |       | 5708 | 12190        | 74056      |       |
|                                                    | #2     |           | 8768  |       |      |       |       |       |       | 510   |       |       |       |        |      |      | 105   |      | 14606        | 1056       | 25045 |
| #2                                                 | #3     |           | 25588 | 6610  |      |       |       |       | 629   | 1161  |       |       |       |        |      |      |       |      |              | 7668       | 41656 |
|                                                    | #4     |           | 12328 | 6695  |      |       |       |       |       | 118   |       |       |       |        |      |      |       |      |              | 9828       | 28969 |
| #3                                                 | #5     | 515       | 22388 | 10378 |      | 353   |       | 385   | 818   | 668   | 536   | 1034  |       | 731    | 441  |      |       |      | 12969        | 10674      | 61375 |
|                                                    | #6     | 561       | 16866 | 5051  | 3825 | 4771  | 3736  | 3938  | 3147  | 874   |       | 3106  |       |        |      |      |       |      |              | 7344       | 52658 |
| #4                                                 | #7     |           | 25811 | 10735 |      |       |       |       |       | 555   |       |       |       |        |      |      |       |      |              | 9308       | 46409 |
|                                                    | #8     |           | 23678 | 7547  |      |       |       |       |       | 223   | 111   |       |       |        |      |      |       |      |              | 8772       | 40331 |
| #5                                                 | #9     |           | 15461 | 1809  |      |       |       |       |       | 8103  | 6975  |       |       |        |      |      |       |      |              | 10682      | 43030 |
|                                                    | #10    | 366       | 38162 | 8426  |      | 1862  |       |       |       | 1644  |       | 1694  |       |        |      | 358  |       | 915  |              | 7477       | 60538 |
| #6                                                 | #11    |           | 28390 | 3002  |      |       |       |       |       | 914   | 427   | 1625  | 704   |        |      |      |       |      |              | 10009      | 45071 |
| #7                                                 | #12    |           | 15104 | 10236 |      |       |       |       |       | 1211  |       | 3426  |       |        |      |      |       |      |              | 10026      | 40003 |
|                                                    | #13    | 156       | 19578 | 3955  |      |       |       | 5450  |       | 1495  | 158   |       | 587   | 1467   |      |      | 408   |      |              | 10051      | 43149 |
| #13                                                | #23    | 627       | 34013 |       |      |       |       | 231   |       | 1063  |       |       |       | 2866   | 177  | 623  | 113   | 171  |              | 2159       | 41416 |
| #14                                                | #24    |           | 21981 | 13860 |      |       |       |       | 120   | 1661  | 193   |       | 587   |        |      |      |       |      | 5100         | 11280      | 54782 |
| #15                                                | #25    |           | 37257 |       |      |       |       | 2594  |       |       |       |       |       |        |      |      |       |      | 194          | 9334       | 49379 |
|                                                    | #26    |           | 16016 |       |      |       |       | 419   |       | 1998  | 126   |       | 1103  |        |      |      |       |      |              | 10576      | 30238 |
|                                                    | #27    |           | 14233 | 12574 |      |       |       |       |       | 184   |       |       |       |        |      |      |       |      |              | 8172       | 35163 |

**Supplementary Table 5 Target areas of the reconstructed neurons in the motor cortex.**

| The target areas of neurons in the motor cortex |        |             |             |       |       |       |       |                |                |            |
|-------------------------------------------------|--------|-------------|-------------|-------|-------|-------|-------|----------------|----------------|------------|
| Mouse                                           | Neuron | Isocortex_i | Isocortex_c | MO_i  | MO_c  | STR_i | STR_c | fiber tracts_i | fiber tracts_c | axon total |
| #16                                             | #29    | 7324        | 0           | 32178 | 0     | 7212  | 0     | 845            | 0              | 47559      |
|                                                 | #30    | 17273       | 0           | 25482 | 9458  | 0     | 0     | 1692           | 2012           | 55917      |
|                                                 | #31    | 0           | 0           | 7593  | 16627 | 0     | 0     | 2044           | 1365           | 27629      |
|                                                 | #32    | 16650       | 1410        | 17542 | 3026  | 6141  | 0     | 2055           | 1427           | 48251      |
| #17                                             | #33    | 2386        | 825         | 41831 | 15568 | 14826 | 15546 | 3128           | 2616           | 96726      |
|                                                 | #34    | 35968       | 20083       | 26350 | 27432 | 44342 | 47852 | 3819           | 5975           | 211821     |
|                                                 | #35    | 12037       | 10575       | 16144 | 18344 | 37186 | 7912  | 4286           | 3350           | 109834     |
|                                                 | #36    | 13731       | 925         | 14330 | 26401 | 14708 | 2228  | 2573           | 2218           | 77114      |
